# Supplementary material for: Exploring the performance of a functionalized CNT-based sensor array for breathomics through clustering and classification algorithms: from gas sensing of selective biomarkers to discrimination of chronic obstructive pulmonary disease
Source: Royal Society of Chemistry journal article supplement (doi:10.1039/d1ra03337a), 2021-01-01
Supplement: d1ra03337a1.pdf [file d1ra03337a1.pdf]

SUPPLEMENTARY MATERIALS TO:

**Exploring the performances of a functionalized CNT-based sensor array for breathomics through clustering and classification algorithms: from gas sensing of selective biomarkers to discrimination of chronic obstructive pulmonary disease**

Giovanni Drera <sup>a,b</sup>, Sonia Freddi <sup>a,b,c</sup>, Aleksei V. Emelianov <sup>d,e</sup>, Ivan I. Bobrinetskiy <sup>d,f</sup>, Maria Chiesa <sup>a</sup>, Michele Zanotti <sup>a,b</sup>, Stefania Pagliara <sup>a,b</sup>, Fedor S. Fedorov <sup>g</sup>, Albert G. Nasibulin <sup>h</sup>, Paolo Montuschi <sup>i</sup>, Luigi Sangaletti <sup>a,b</sup>

- a) Department of Mathematics and Physics, Università Cattolica del Sacro Cuore, via dei Musei 41, 25121 Brescia, Italy.
- b) Surface Science and Spectroscopy Lab @ I-Lamp, Università Cattolica del Sacro Cuore, Brescia Campus, Italy.
- c) Department of Chemistry, Division of Molecular Imaging and Photonics, KU Leuven, Celestijnenlaan 200F, 3001 Leuven, Belgium.
- d) National Research University of Electronic Technology, Moscow, Zelenograd, 124498, Russia.
- e) P.N. Lebedev Physical Institute of the Russian Academy of Sciences, Moscow, 119991, Russia.
- f) BioSense Institute - Research and Development Institute for Information Technologies in Biosystems, University of Novi Sad, Dr Zorana Djindjica 1a, 21000 Novi Sad, Serbia.
- g) Skolkovo Institute of Science and Technology, Moscow 143026, Russia.
- h) Aalto University, Department of Chemistry and Materials Science, FI-00076, Espoo, Finland
- i) Department of Pharmacology, Faculty of Medicine, Catholic University of the Sacred Heart, Largo Francesco Vito, 1, 00168 Roma, Italy.

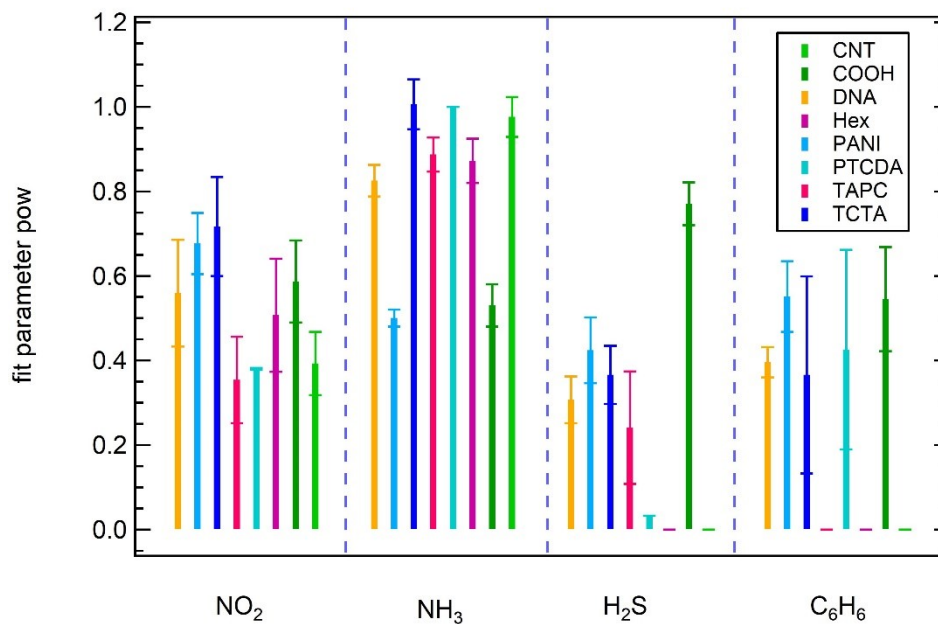

**Figure S1:** pow parameter obtained from the Freundlich isotherm interpolation of each sensor calibration curve for NO<sub>2</sub>, NH<sub>3</sub>, H<sub>2</sub>S and C<sub>6</sub>H<sub>6</sub> exposures, reported in Figure 3 of the main text.

**Table S1:** Subjects characteristics and number of tests carried out for each subject. From A to C the COPD severity increases.

| Subject | Class   | Gender | Age | COPD category | Number of tests |
|---------|---------|--------|-----|---------------|-----------------|
| 1       | COPD    | M      | 75  | B             | 4               |
| 2       | COPD    | F      | 32  | A             | 4               |
| 3       | COPD    | F      | 62  | C             | 4               |
| 4       | COPD    | F      | 64  | B             | 6               |
| 5       | COPD    | M      | 72  | A             | 3               |
| 6       | COPD    | F      | 73  | B             | 6               |
| 7       | COPD    | F      | 88  | C             | 3               |
| 8       | Healthy | F      | 28  | -             | 9               |
| 9       | Healthy | M      | 45  | -             | 6               |
| 10      | Healthy | M      | 22  | -             | 3               |
| 11      | Healthy | F      | 42  | -             | 4               |

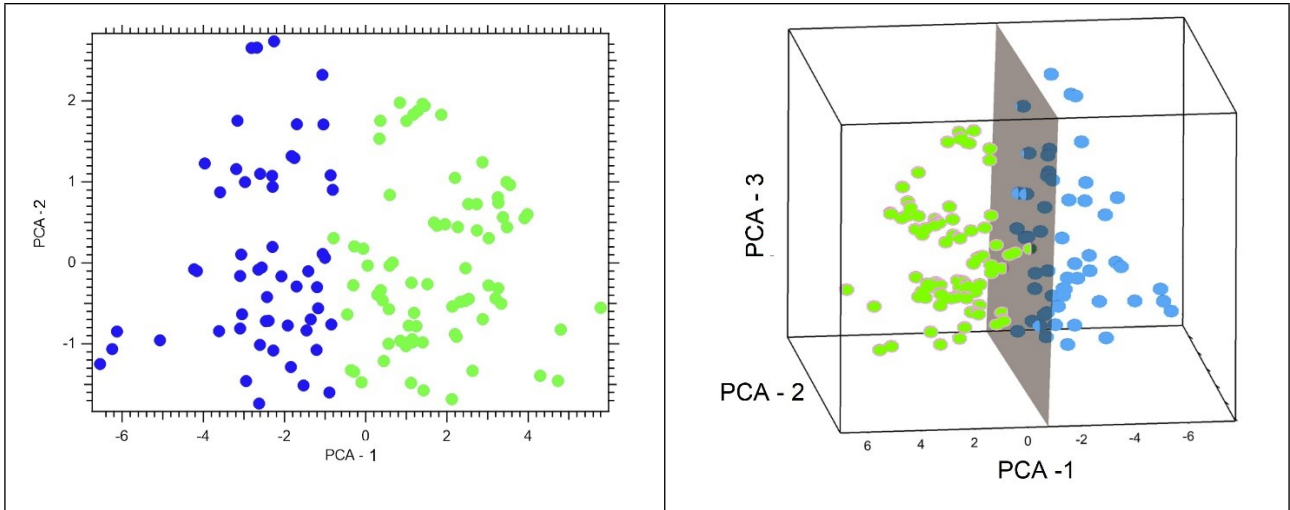

**Figure S2.** Left panel: 2D plot along the main PCA components obtained from the analysis of 130 cases. Blue dots: healthy, green dots: COPD. Right panel: 3D plot along the three main PCA components obtained from the analysis of 130 cases. Blue dots: healthy, green dots: COPD. Gray plane: SVM separation plane.
